# Supplementary material for: Synthesis of vertical WO3 nanoarrays with different morphologies using the same protocol for enhanced photocatalytic and photoelectrocatalytic performances
Source: Royal Society of Chemistry journal article supplement (doi:10.1039/d1ra03149j), 2021-01-01
Supplement: d1ra03149j1.pdf [file d1ra03149j1.pdf]

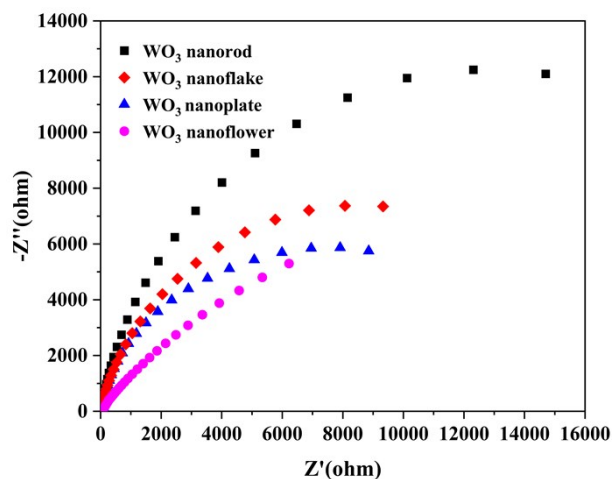

**Fig. S1** EIS Nyquist plots of the WO<sub>3</sub> arrays.

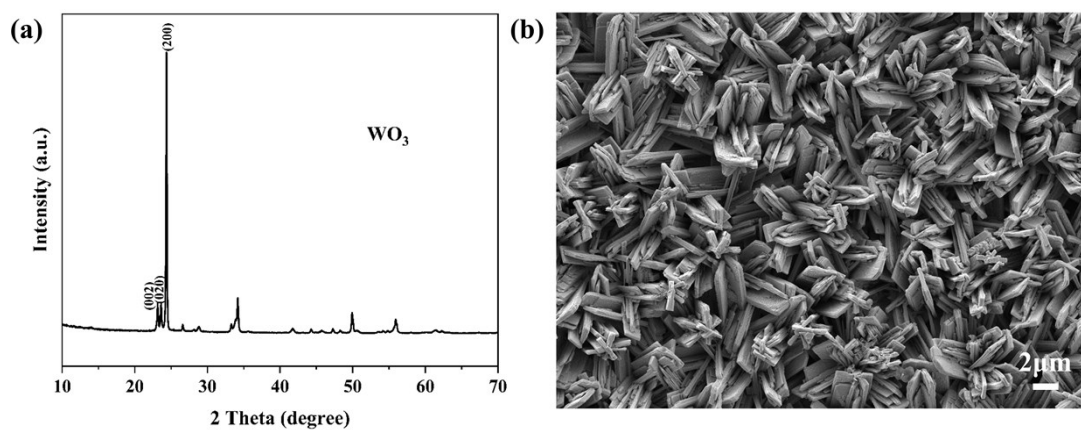

**Fig. S2** (a) XRD patterns and (b) FESEM image of the WO<sub>3</sub> nanoflower arrays after the photocatalytic and photoelectrocatalytic reaction.
